# Supplementary material for: Increase in serum choline levels predicts for improved progression-free survival (PFS) in patients with advanced cancers receiving pembrolizumab
Source: PubMed Central journal article supplement — J Immunother Cancer. 2022 Jun 15;10(6):e004378. doi: 10.1136/jitc-2021-004378 (PMC9204435; doi:10.1136/jitc-2021-004378), 2022-06-15
Supplement: jitc-2021-004378supp002.pdf [file jitc-2021-004378supp002.pdf]

**Supplementary Table 1.** Multiplex IHC Panel

| Order of Addition | Marker        | Clone   | Vendor            | Catalog #  | Antibody Dilution | OPAL Dye | OPAL Dilution |
|-------------------|---------------|---------|-------------------|------------|-------------------|----------|---------------|
| 1                 | CD8           | SP57    | Roche             | 5937248001 | 1x                | 570      | 1:400         |
| 2                 | CD68          | KP1     | DAKO              | 76535      | 1:100             | 620      | 1:100         |
| 3                 | FOXP3         | 236A/E7 | abcam             | ab20034    | 1:500             | 690      | 1:100         |
| 4                 | CD20          | L26     | Inter Medico      | BC-CM004A  | 1:1000            | 540      | 1:100         |
| 5                 | CD3           | 2GV6    | Roche             | 5278422001 | 1x                | 650      | 1:400         |
| 6                 | PanCK         | AE1/AE3 | Inter Medico      | BC-CM011B  | 1:500             | 520      | 1:100         |
| 7                 | Spectral DAPI | n/a     | Akoya Biosciences | FP1490     | n/a               | n/a      | n/a           |

**Supplementary Table 2.** Baseline characteristics of entire INSPIRE Cohort (n=106).

| Characteristic                            | n=106            |
|-------------------------------------------|------------------|
| <b>Age</b>                                |                  |
| Median (Min,Max)                          | 59.4 (21.1,81.8) |
| <b>Sex</b>                                |                  |
| Female                                    | 66 (62)          |
| Male                                      | 40 (38)          |
| <b>Ethnicity</b>                          |                  |
| American Indian or Alaska Native          | 1 (1)            |
| Asian                                     | 14 (13)          |
| Black or African American                 | 3 (3)            |
| Native Hawaiian or other pacific islander | 2 (2)            |
| Unknown or not reported                   | 2 (2)            |
| White                                     | 84 (79)          |
| <b>Cohort</b>                             |                  |
| A                                         | 19 (18)          |
| B                                         | 22 (21)          |

|                                      |                  |
|--------------------------------------|------------------|
| C                                    | 21 (20)          |
| D                                    | 12 (11)          |
| E                                    | 32 (30)          |
| <b>Stage at diagnosis</b>            |                  |
| 1                                    | 8 (8)            |
| 2                                    | 23 (22)          |
| 3                                    | 25 (24)          |
| 4                                    | 38 (36)          |
| X                                    | 12 (11)          |
| <b>History of autoimmune disease</b> |                  |
| No                                   | 101 (96)         |
| Yes                                  | 4 (4)            |
| Missing                              | <b>1</b>         |
| <b>PD-L1 percentage</b>              |                  |
| 0                                    | 52 (50)          |
| 1-10                                 | 26 (25)          |
| 11-25                                | 8 (8)            |
| 26-49                                | 4 (4)            |
| 50+                                  | 13 (13)          |
| Missing                              | <b>3</b>         |
| <b>PD-L1</b>                         |                  |
| zero                                 | 52 (50)          |
| positive                             | 51 (50)          |
| Missing                              | <b>3</b>         |
| <b>PD-L1 percentage</b>              |                  |
| Mean (sd)                            | 15 (30.1)        |
| Median (Min,Max)                     | 0 (0,100)        |
| Missing                              | <b>3</b>         |
| <b>TMB</b>                           |                  |
| Mean (sd)                            | 5.7 (19.7)       |
| Median (Min,Max)                     | 2 (0.5,187)      |
| Missing                              | <b>12</b>        |
| <b>log TMB</b>                       |                  |
| Mean (sd)                            | 0.9 (1)          |
| Median (Min,Max)                     | 0.7 (-0.8,5.2)   |
| Missing                              | <b>12</b>        |
| <b>Follow-up (months)</b>            |                  |
| Median (Min,Max)                     | 12.6 (0.6, 58.1) |

**Supplementary Table 3.** Baseline characteristics of evaluable patients for ΔcholineC<sub>3</sub> analysis (n=81).

| <b>Characteristic</b>                     | <b>n=81</b>      |
|-------------------------------------------|------------------|
| <b>Age</b>                                |                  |
| Median (Min,Max)                          | 60.9 (21.1,81.8) |
| <b>Sex</b>                                |                  |
| Female                                    | 44 (54)          |
| Male                                      | 37 (46)          |
| <b>Ethnicity</b>                          |                  |
| American Indian or Alaska Native          | 0 (0)            |
| Asian                                     | 11 (14)          |
| Black or African American                 | 3 (4)            |
| Native Hawaiian or other pacific islander | 0 (0)            |
| Unknown or not reported                   | 1 (1)            |
| White                                     | 66 (81)          |
| <b>Cohort</b>                             |                  |
| A                                         | 17 (21)          |
| B                                         | 12 (15)          |
| C                                         | 12 (15)          |
| D                                         | 11 (14)          |
| E                                         | 29 (36)          |
| <b>Stage at diagnosis</b>                 |                  |
| 1                                         | 7 (9)            |
| 2                                         | 18 (22)          |
| 3                                         | 13 (16)          |
| 4                                         | 31 (38)          |
| X                                         | 12 (15)          |
| <b>History of autoimmune disease</b>      |                  |
| No                                        | 78 (98)          |
| Yes                                       | 2 (3)            |
| Missing                                   | <b>1</b>         |
| <b>PD-L1 percentage</b>                   |                  |
| 0                                         | 38 (47)          |
| 1-10                                      | 22 (27)          |
| 11-25                                     | 5 (6)            |
| 26-49                                     | 3 (4)            |
| 50+                                       | 13 (16)          |
| <b>PD-L1</b>                              |                  |

|                           |                 |
|---------------------------|-----------------|
| zero                      | 38 (47)         |
| positive                  | 43 (53)         |
| <b>PD-L1 percentage</b>   |                 |
| Mean (sd)                 | 17.8 (33.1)     |
| Median (Min,Max)          | 1 (0,100)       |
| <b>TMB</b>                |                 |
| Mean (sd)                 | 6.7 (22.3)      |
| Median (Min,Max)          | 2 (0.5,187)     |
| Missing                   | 8               |
| <b>log TMB</b>            |                 |
| Mean (sd)                 | 1 (1.1)         |
| Median (Min,Max)          | 0.7 (-0.8,5.2)  |
| Missing                   | 8               |
| <b>Follow-up (months)</b> |                 |
| Median (Min,Max)          | 17.8 (2.3,58.1) |

**Supplementary Table 4.** Baseline characteristics of evaluable patients for both  $\Delta$ choline<sub>C3</sub> and  $\Delta$ ctDNA<sub>C3</sub> analysis (n=72).

| Characteristic                            | n=72             |
|-------------------------------------------|------------------|
| <b>Age</b>                                |                  |
| Median (Min,Max)                          | 60.2 (21.1,81.8) |
| <b>Sex</b>                                |                  |
| Female                                    | 39 (54)          |
| Male                                      | 33 (46)          |
| <b>Ethnicity</b>                          |                  |
| American Indian or Alaska Native          | 0 (0)            |
| Asian                                     | 8 (11)           |
| Black or African American                 | 2 (3)            |
| Native Hawaiian or other pacific islander | 0 (0)            |
| Unknown or not reported                   | 1 (1)            |
| White                                     | 61 (85)          |
| <b>Cohort</b>                             |                  |
| A                                         | 14 (19)          |
| B                                         | 10 (14)          |
| C                                         | 10 (14)          |
| D                                         | 10 (14)          |
| E                                         | 28 (39)          |
| <b>Stage at diagnosis</b>                 |                  |
| I                                         | 6 (8)            |

|                                      |                |
|--------------------------------------|----------------|
| 2                                    | 17 (24)        |
| 3                                    | 12 (17)        |
| 4                                    | 26 (36)        |
| X                                    | 11 (15)        |
| <b>History of autoimmune disease</b> |                |
| No                                   | 70 (97)        |
| Yes                                  | 2 (3)          |
| <b>PD-L1 percentage</b>              |                |
| 0                                    | 35 (49)        |
| 1-10                                 | 20 (28)        |
| 11-25                                | 5 (7)          |
| 26-49                                | 3 (4)          |
| 50+                                  | 9 (12)         |
| <b>PD-L1</b>                         |                |
| zero                                 | 35 (49)        |
| positive                             | 37 (51)        |
| <b>PD-L1 percentage</b>              |                |
| Mean (sd)                            | 15.3 (31.1)    |
| Median (Min,Max)                     | 1 (0,100)      |
| <b>TMB</b>                           |                |
| Mean (sd)                            | 6.7 (22.4)     |
| Median (Min,Max)                     | 2 (0.5,187)    |
| <b>log TMB</b>                       |                |
| Mean (sd)                            | 1 (1.1)        |
| Median (Min,Max)                     | 0.7 (-0.8,5.2) |
| <b>Follow-up (months)</b>            |                |
| Median (Min,Max)                     | 18 (2.3,58.1)  |

**Supplementary Table 5.** Baseline characteristics of evaluable patients with a decrease in ctDNA at cycle 3 (n=33) and stratified by  $\Delta$ choline<sub>C3</sub>. Fisher's exact test and Wilcoxon's rank sum test were used to compare categorical and continuous variables, respectively, between the two groups.

| Covariate        | Full Sample (n=33) | Increase in choline (n=20) | Decrease in choline (n=13) | p-value |
|------------------|--------------------|----------------------------|----------------------------|---------|
| <b>Age</b>       |                    |                            |                            | 0.41    |
| Mean (sd)        | 61.2 (11.6)        | 59.4 (12.6)                | 63.9 (9.6)                 |         |
| Median (Min,Max) | 65.1 (34.1,78.2)   | 63.3 (34.1,74.8)           | 65.7 (45.0,78.2)           |         |
| <b>Sex</b>       |                    |                            |                            | 1       |
| Female           | 19 (58)            | 12 (60)                    | 7 (54)                     |         |

|                                           |                 |                 |                |      |
|-------------------------------------------|-----------------|-----------------|----------------|------|
| Male                                      | 14 (42)         | 8 (40)          | 6 (46)         |      |
| <b>Ethnicity</b>                          |                 |                 |                | 0.62 |
| American Indian or Alaska Native          | 0 (0)           | 0 (0)           | 0 (0)          |      |
| Asian                                     | 5 (15)          | 2 (10)          | 3 (23)         |      |
| Black or African American                 | 1 (3)           | 1 (5)           | 0 (0)          |      |
| Native Hawaiian or other Pacific Islander | 0 (0)           | 0 (0)           | 0 (0)          |      |
| Unknown or not reported                   | 0 (0)           | 0 (0)           | 0 (0)          |      |
| White                                     | 27 (82)         | 17 (85)         | 10 (77)        |      |
| <b>Cohort</b>                             |                 |                 |                | 0.16 |
| A                                         | 6 (18)          | 1 (5)           | 5 (38)         |      |
| B                                         | 4 (12)          | 2 (10)          | 2 (15)         |      |
| C                                         | 5 (15)          | 4 (20)          | 1 (8)          |      |
| D                                         | 8 (24)          | 6 (30)          | 2 (15)         |      |
| E                                         | 10 (30)         | 7 (35)          | 3 (23)         |      |
| <b>Stage at diagnosis</b>                 |                 |                 |                | 0.61 |
| 1                                         | 3 (9)           | 3 (15)          | 0 (0)          |      |
| 2                                         | 7 (21)          | 3 (15)          | 4 (31)         |      |
| 3                                         | 6 (18)          | 4 (20)          | 2 (15)         |      |
| 4                                         | 13 (39)         | 8 (40)          | 5 (38)         |      |
| X                                         | 4 (12)          | 2 (10)          | 2 (15)         |      |
| <b>History of autoimmune disease</b>      |                 |                 |                | 1    |
| No                                        | 33 (100)        | 20 (100)        | 13 (100)       |      |
| Yes                                       | 0 (0)           | 0 (0)           | 0 (0)          |      |
| <b>PD-L1</b>                              |                 |                 |                | 0.17 |
| zero                                      | 15 (45)         | 7 (35)          | 8 (62)         |      |
| positive                                  | 18 (55)         | 13 (65)         | 5 (38)         |      |
| <b>PD-L1 percentage</b>                   |                 |                 |                | 0.3  |
| 0                                         | 15 (45)         | 7 (35)          | 8 (62)         |      |
| 1-10                                      | 6 (18)          | 3 (15)          | 3 (23)         |      |
| 11-25                                     | 4 (12)          | 4 (20)          | 0 (0)          |      |
| 26-49                                     | 1 (3)           | 1 (5)           | 0 (0)          |      |
| 50+                                       | 7 (21)          | 5 (25)          | 2 (15)         |      |
| <b>PD-L1 percentage</b>                   |                 |                 |                | 0.15 |
| Mean (sd)                                 | 23.3 (38.1)     | 28.2 (39.9)     | 15.7 (35.4)    |      |
| Median (Min,Max)                          | 1 (0,100)       | 6.5 (0.0,100.0) | 0 (0,100)      |      |
| <b>TMB</b>                                |                 |                 |                | 0.52 |
| Mean (sd)                                 | 11.1 (32.6)     | 15.4 (41.5)     | 4.7 (4.2)      |      |
| Median (Min,Max)                          | 2.1 (0.6,187.0) | 1.7 (0.6,187.0) | 3.1 (1.0,15.3) |      |
| <b>log TMB</b>                            |                 |                 |                | 0.52 |
| Mean (sd)                                 | 1.2 (1.3)       | 1.2 (1.6)       | 1.2 (0.9)      |      |
| Median (Min,Max)                          | 0.8 (-0.5,5.2)  | 0.5 (-0.5,5.2)  | 1.1 (0.0,2.7)  |      |

|                           |                 |                 |                 |               |
|---------------------------|-----------------|-----------------|-----------------|---------------|
| <b>Follow-up (months)</b> |                 |                 |                 | <b>0.0071</b> |
| Median (Min,Max)          | 35.4 (2.3,52.8) | 40.3 (5.0,52.8) | 18.2 (2.3,51.9) |               |

**Supplementary Table 6.** Patient demographics, clinical and treatment characteristics of the patients in the validation (LIBERATE) cohort in early phase clinical trials (n=51).

| <b>Characteristic</b>                                                                                                                                                                                        | <b>n=51</b> |
|--------------------------------------------------------------------------------------------------------------------------------------------------------------------------------------------------------------|-------------|
| <b>Age</b>                                                                                                                                                                                                   |             |
| Median (Min,Max)                                                                                                                                                                                             | 60 (29-79)  |
| <b>Gender</b>                                                                                                                                                                                                |             |
| Female                                                                                                                                                                                                       | 25 (49)     |
| Male                                                                                                                                                                                                         | 26 (51)     |
| <b>Treatment</b>                                                                                                                                                                                             |             |
| PD-1 monotherapy                                                                                                                                                                                             | 4 (8)       |
| Combination with any checkpoint inhibitor (non PD-1)                                                                                                                                                         | 25 (49)     |
| Combination with ERK inhibitor                                                                                                                                                                               | 10 (19)     |
| Combination with Interleukins                                                                                                                                                                                | 6 (12)      |
| Combination with other immunomodulators                                                                                                                                                                      | 6 (12)      |
| <b>Cancer Type</b>                                                                                                                                                                                           |             |
| Sarcoma                                                                                                                                                                                                      | 7 (13)      |
| Colorectal                                                                                                                                                                                                   | 6 (11)      |
| Breast                                                                                                                                                                                                       | 4 (8)       |
| Mesothelioma                                                                                                                                                                                                 | 4 (8)       |
| Melanoma                                                                                                                                                                                                     | 3 (6)       |
| Cholangiocarcinoma                                                                                                                                                                                           | 3 (6)       |
| Renal                                                                                                                                                                                                        | 3 (6)       |
| Endometrium                                                                                                                                                                                                  | 3 (6)       |
| Head and Neck (Squamous)                                                                                                                                                                                     | 2 (4)       |
| Cervix                                                                                                                                                                                                       | 2 (4)       |
| Prostate                                                                                                                                                                                                     | 2 (4)       |
| Others (1 case each): suprarenal, esophagus, cutaneous adenocarcinoma, gastric, neuroendocrine tumor, anal, conjunctival melanoma, small cell lung carcinoma, nasopharynx, ovarian, pancreas, salivary gland | 12 (24)     |
| <b>Treatment Response</b>                                                                                                                                                                                    |             |

|                       |         |
|-----------------------|---------|
| Complete Response     | 3 (6)   |
| Partial Response      | 4 (8)   |
| Stable Disease        | 8 (16)  |
| Progressive Disease   | 36 (70) |
| Clinical Benefit Rate | 15 (29) |
